# Supplementary material
Source: PubMed Central journal article supplement (PMC2787705)
Supplement: NIHMS159461-supplement-1_si_001.pdf [file NIHMS159461-supplement-1_si_001.pdf]

# Generation of Thiocillin Variants by Prepeptide Gene Replacement and *In Vivo* Processing by *Bacillus cereus*

Michael G. Acker, Albert A. Bowers, and Christopher T. Walsh\*

*Department of Biological Chemistry and Molecular Pharmacology, Harvard Medical School, Boston, Massachusetts 02115*

## Supporting Information

### Contents:

1. Materials and General Methods
2. Generation of *tcIΔE-H* Knockout Strain
3. Rescue of Thiocillin Production by *tcIE* Integration
4. Mutagenesis of *tcIE* in pMGA-*tcIE*-KI
5. Extraction of Thiocillin Compounds
6. LC-MS and MS/MS Analysis
  - a. Procedure
  - b. Summary (SI Table 8.1)
  - c. MS Traces of Individual Compounds
  - d. MS/MS data
    - i. T3K-succinylated
    - ii. 3 x T8C
    - iii. 2 x WT
7. <sup>1</sup>H NMR Analysis
8. Disk Diffusion Antibiotic Activity Assays
9. Determination of Minimum Inhibitory Concentrations (MICs)

### 1. Materials and General Methods

All molecular biology, recombinant DNA manipulation and microbiological assays were performed following the protocols of Sambrook *et al.*<sup>1</sup> Unless otherwise specified, all chemicals were purchased from Sigma-Aldrich. Restriction enzymes and Quick Ligase were purchased from New England Biolabs (Boston, MA). Pfu Turbo DNA Polymerase was purchased from Invitrogen (Carlsbad, CA) and Paq 5000 DNA polymerase from Stratagene (La Jolla, CA). DNA oligonucleotide primers were synthesized by Integrated DNA technologies (Coralville, IA). PCR was performed on a Biorad MyCycler thermal cycler. DNA sequencing was performed by the Molecular Biology Core Facilities at the Dana Farber Cancer Institute (Boston, MA). Top10 chemically competent *E. coli* cells were purchased from Invitrogen. Restriction endonuclease cleanup and gel extraction of DNA fragments were performed with QiaQuick PCR cleanup kit from Qiagen. Recombinant plasmids were isolated using the QiaPrep Spin Miniprep Kit from Qiagen. *B. cereus* ATCC 14579 genomic DNA was isolated from cultures using the DNeasy Kit from Qiagen. Extraction of thiocillins from cell-free media was performed on Sep-Pak C18 cartridges from Waters Corp. (Milford, MA). Analytical RP-HPLC was performed on a Beckman System Gold (Beckman Coulter) instrument using a Phenomenex Luna 5 μm C18(2) 100 Å 250 x 4.6 mm column, monitoring eluent absorption at 220 and 350 nm. Preparative RP-HPLC was

performed on a Beckman System Gold (Beckman Coulter) instrument using a Phenomenex Luna 10  $\mu\text{m}$  C18(2) 100  $\text{\AA}$  250 x 21.20 mm column. Purification of derivatives from crude extracts was also performed on a Biotage Isolera flash purification system (Biotage) using silica gel columns.  $^1\text{H}$  NMR spectra were recorded on a Varian 600 MHz spectrometer. Chemical shifts are reported in ppm from tetramethylsilane with the solvent resonance resulting from incomplete deuteration as the internal standard (CDCl<sub>3</sub>  $\delta$  7.26, D<sub>2</sub>O  $\delta$  4.79, CD<sub>3</sub>OD  $\delta$  3.31). Data are reported as follows: chemical shift, multiplicity (s = singlet, d = doublet, t = triplet, q = quartet, br = broad, m = multiplet), coupling constants (Hz), and integration.

## 2. Generation of *tcI* $\Delta$ E-H Knockout Strain

Plasmid pMGA-*tcI* $\Delta$ E-H was generated from plasmid pKM082<sup>2</sup>, containing ampicillin and erythromycin resistance cassettes. To enable blue-white selection for identification of *tcI*E-H knockout strains, a complete *LacZ* gene containing promoter and coding region was cloned from pMAD<sup>3</sup> with *Pst*I restriction endonuclease sites at both 5' and 3' sites (**SI Table 2.1**) and ligated into the *Pst*I site of pKM082. Transformants containing *LacZ* were isolated based on their blue color when plated on LB plates containing 50  $\mu\text{g}/\text{mL}$  XGAL. Into this new plasmid, two DNA fragments of  $\sim 1$  kb homology to the *tcI*E gene cluster surrounding *tcI*E-H were individually cloned (**SI Figure 2.1**). The left fragment (LF) contained homology from *tcI*D up to but not including the start codon of *tcI*E and was inserted using 5' *Bam*HI and 3' *Sph*I restriction endonuclease sites. Finally, the right fragment (RF) contained homology beginning immediately after the *tcI*H stop codon and continuing into *tcI*I. The RF was cloned with both 5' and 3' *Sph*I restriction sites. After ligation into the plasmid *Sph*I site restriction site, transformants were sequenced to identify those containing RF in the correct directional orientation. The resulting plasmid contained two  $\sim 1$  kb regions of homology to the *tcI* gene cluster, replacing the sequence from the *tcI*E start codon to the *tcI*H stop codon (771 bp) with the sequence GCATGC corresponding to the *Sph*I restriction sequence.

**SI Figure 2.1. Strategies for *tcI*E knockout and *in vivo* replacement**

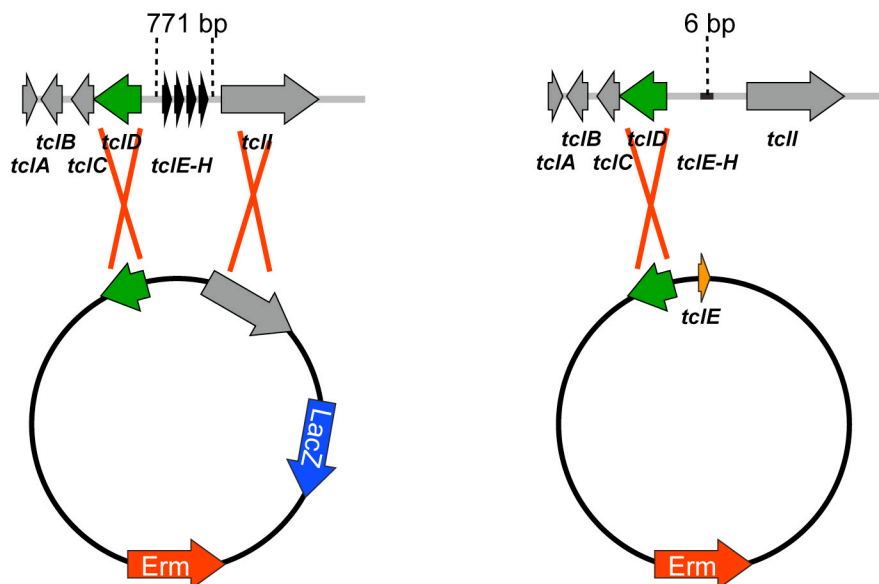

Because *B. cereus* are less efficient at double-crossover homologous recombination than *B. subtilis*, removal of *tcI*E-H from the genome of *B. cereus* ATCC 14579 was accomplished through two individual rounds of homologous recombination. In the first round, the

entire plasmid is integrated into the chromosome by Campbell integration. Plasmid pMGA-tclE-H was transformed into *B. cereus* ATCC 14579 following the previously published protocol<sup>4</sup>. Positive transformants (containing a chromosomally-integrated plasmid) were selected for on MLS LB-agar plates (containing 1µg/ml erythromycin and 25µg/mL lincomycin) for 36 hours at 30 °C. The second round of homologous recombination involves the removal of the plasmid through a second homologous recombination event. This event removes both the erythromycin resistance cassette and the LacZ cassette, allowing for identification of revertants by their white color when grown on plates containing Xgal. Individual colonies were transferred to LB liquid cultures without antibiotic and incubated for 24 hours at 30 °C. The liquid cultures were diluted 1:1000 in antibiotic free LB and again incubated for 24 hours at 30 °C. After 5-7 rounds of dilution and growth, the cultures were diluted 10<sup>-4</sup> – 10<sup>-7</sup> and 100 µl were plated on LB agar supplemented with 100µg/mL Xgal. After 20-24 hours at 37 °C, plates were analyzed for the presence of white colonies, indicating removal of the plasmid by homologous recombination. Because the original plasmid contained two areas of homology to the thiocillin gene cluster, the recombination event to remove the plasmid from the genome can result in two possible products with equal probability: 1) a reversion to the WT *B. cereus* or 2) the removal of *tclE-H*, generating a knockout of these genes. To differentiate between the two possibilities, colony PCR reactions were carried out using oligonucleotide primers to *tclD* and *tclI*. Knockout strains were confirmed by the loss of 771 bp in the PCR product due to the removal of *tclE-H* and verified by DNA sequencing.

**SI Table 2.1. Oligonucleotides used for cloning and *tclE* mutagenesis**

| Oligo       | Sequence                                                      | Role                               |
|-------------|---------------------------------------------------------------|------------------------------------|
| Primer 72   | 5'-GGAATTCCCTGCAGCGAGGCC TTTAGCATATTATGTTGCC-3'               | PCR of LacZ –PstI ends             |
| Primer 89   | 5'-GGAATTCCCTGCAGAGATCTGTCTAGTTAATGTGTAACGTAAC-3'             | PCR of LacZ –PstI ends             |
| LCW001      | 5'-GTACGGATCCCATACTCCCAGATTATTTGCAGTCGTAAC-3'                 | PCR of LF-BamHI/SphI ends          |
| Primer 133  | 5'-GATCGCATGCACTCATCCACCTACAAGAAATTTTTGG-3'                   | PCR of LF-BamHI/SphI ends          |
| Primer 87   | 5'-GGAATTCCGCATGCTTTTTCAAGAAGCTTAATTGTTCTCCCC-3'              | PCR of RF-SphI ends                |
| Primer 88   | 5'-GGAATTCCGCATGCGCGGAATTTGTTTCTAGAACCTCTACC-3'               | PCR of RF-SphI ends                |
| LCW019      | 5'-GTACACTAGTCTCCTCTCTAATTGATTTAATTACAG-3'                    | Clone <i>tclE</i> -EcoRI/SpeI ends |
| LCW021      | 5'-GTACGAATTCTCAAGTTGTACAACAACACTGCATGTAC-3'                  | Clone <i>tclE</i> -EcoRI/SpeI ends |
| Primer 125  | 5'-CAGTAAGCATATGTATACTCCTCTCTAATTGATTTAATTACAG-3'             | Make pLW111 <i>tclE</i> 5'UTR WT   |
| Primer 126  | 5'-CTGTAATTAATCAATTAGAGAGGAGTATACATATGCTTACTG-3'              | Make pLW111 <i>tclE</i> 5'UTR WT   |
| Primer 129a | 5'-GATCGCATGCTTTTTCAAGAAGCTTAATTGTTCTCC-3'                    | Clone <i>tclH</i> 3'UTR-SphI ends  |
| Primer 129b | 5'-GATCGCATGCTCAAATATTTACTGATTTCACTAAAAAACG-3'                | Clone <i>tclH</i> 3'UTR-SphI ends  |
| Primer 131  | 5'-GTACATGCAGTTGTTGTACAACCTAATTTTTCAAGAAGCTTAATTGTTC TCC-3'   | Remove EcoRI-SphI sequence         |
| Primer 132  | 5'-GGAGAACAATTAAGCTTCTTGAAAAATTAAGTTGTACAACAACACTGCAT GTAC-3' | Remove EcoRI-SphI sequence         |
| Primer 55   | 5'-ATTATGGGAGCGTCATGTAAAACATGCGTATGTACATGC-3'                 | T3K mutagenesis                    |
| Primer 56   | 5'-GCATGTACATACGCATGTTTTACATGACGCTCCCATAAT-3'                 | T3K mutagenesis                    |
| Primer 53   | 5'-ATTATGGGAGCGTCATGTGATACATGCGTATGTACATGC-3'                 | T3D mutagenesis                    |
| Primer 54   | 5'-GCATGTACATACGCATGTATCACATGACGCTCCCATAAT-3'                 | T3D mutagenesis                    |

|            |                                                      |                  |
|------------|------------------------------------------------------|------------------|
| Primer 209 | 5'-GAAATTATGGGAGCGTCATGTGCGACATGCGTATGTACATGCAG-3'   | T3A mutagenesis  |
| Primer 210 | 5'-CTGCATGTACATACGCATGTGCGACATGACGCTCCATAATTTC-3'    | T3A mutagenesis  |
| Primer 213 | 5'-GGAGCGTCATGTACGAAATGCGTATGTACATGC-3'              | T4K mutagenesis  |
| Primer 214 | 5'-GCATGTACATACGCATTTTCGTACATGACGCTCC-3'             | T4K mutagenesis  |
| Primer 67  | 5'-ATTATGGGAGCGTCATGTACGGTTTTCGTATGTACATGCAGTTG-3'   | T4V mutagenesis  |
| Primer 68  | 5'-CAACTGCATGTACATACGCAAACCGTACATGACGCTCCATAAT-3'    | T4V mutagenesis  |
| Primer 61  | 5'-GCGTCATGTACGACATGCGATTGTACATGCAGTTGTTGTAC-3'      | V6D mutagenesis  |
| Primer 62  | 5'-GTACAACAACACTGCATGTACAATCGCATGTCGTACATGACGC-3'    | V6D mutagenesis  |
| Primer 63  | 5'-GCGTCATGTACGACATGCAAATGTACATGCAGTTGTTGTAC-3'      | V6K mutagenesis  |
| Primer 64  | 5'-GTACAACAACACTGCATGTACATTTGCATGTCGTACATGACGC-3'    | V6K mutagenesis  |
| Primer 59  | 5'-GCGTCATGTACGACATGCGCTTGTACATGCAGTTGTTGTAC-3'      | V6A mutagenesis  |
| Primer 60  | 5'-GTACAACAACACTGCATGTACAAGCGCATGTCGTACATGACGC-3'    | V6A mutagenesis  |
| Primer 150 | 5'-CATGTACGACATGCGTATGTACATGCAGTTGTTGTACAACCTTGA-3'  | T8C mutagenesis  |
| Primer 151 | 5'-TCAAGTTGTACAACAACACTGCAACAACATACGCATGTCGTACATG-3' | T8C mutagenesis  |
| Primer 211 | 5'-CATGTACGACATGCGTATGTGCATGCAGTTGTTGTACAACCTTG-3'   | T8A mutagenesis  |
| Primer 212 | 5'-CAAGTTGTACAACAACACTGCATGCACATACGCATGTCGTACATG-3'  | T8A mutagenesis  |
| Primer 215 | 5'-CATGTACGACATGCGTATGTAATGCAGTTGTTGTACAACCTTG-3'    | T8K mutagenesis  |
| Primer 216 | 5'-CAAGTTGTACAACAACACTGCATTTACATACGCATGTCGTACATG-3'  | T8K mutagenesis  |
| Primer 189 | 5'-GTATGTACATGCAGTTGTTGTGCAACTTGATTTTTCAAGAAGC-3'    | T13A mutagenesis |
| Primer 190 | 5'-GCTTCTTGAAAAATCAAGTTGCACAACAACACTGCATGTACATAC-3'  | T13A mutagenesis |

### 3. Rescue of Thiocillin Production by *tcIE* Integration

In order to rescue production of thiocillin in the *B. cereus tclΔE-H* strain, we inserted a single copy of *tcIE* into the knock-out genome by Campbell integration of a plasmid containing *tcIE*. To minimize any problems due to potential promoter or terminator requirement for *tcIE* production, the 5' UTR of *tcIE* and the 3' UTR of *tclH* (the fourth and final copy of *tcIE* in the *tcl* gene cluster), which could contain these elements, were included. Plasmid pMGA-*tcIE*-KI was generated using pLW111<sup>2</sup> which already contains ~1 kb of homology to *tclD*. Briefly, *tcIE* along with its 5' UTR was cloned from *B. cereus* ATCC 14579 genomic DNA with *SpeI* and *EcoRI* restriction endonuclease sites at the 5' and 3' ends respectively, and cloned into pLW111. This resulted in a duplication of a small section of the 5'UTR (which already existed in pLW111) and this was removed by site directed mutagenesis. The 3' UTR of *tclH* was cloned from genomic DNA with *SphI* sites at both the 5' and 3' ends, and inserted into the corresponding site in the plasmid. DNA sequencing identified those clones containing *tclH* 3'UTR in the correct directional orientation. Finally, site directed mutagenesis was performed to remove extra sequence between the *EcoRI* and *SphI* sites, resulting in a plasmid containing the unaltered sequence *tclD*-5'UTR-*tcE*-3'UTR.

pMGA-*tcIE*-KI was transformed into *B. cereus tclΔE-H* and positive transformants were selected for on MLS-LB agar for 36 hours at 30 °C. *tcIE* knock-in clones were confirmed by the appearance of a product from PCR reactions using oligos specific to *tcIE*.

### 4. Mutagenesis of *tcIE* in pMGA-*tcIE*-KI

Mutants of *tcIE* were generated by site-directed mutagenesis of plasmid pMGA-*tcIE*-KI using overlapping primer extension. Briefly, homologous primers were designed each containing the mutation of interest flanked by 15-20 bps of homologous plasmid DNA sequence. PCR was performed with *Pfu Turbo* to extend the primers, generating entire circular plasmid strands, each containing the mutation of interest. Restriction endonuclease *DpnI* was then added to the reaction. *DpnI* selectively cleaves the methylated template plasmid, having been purified from bacterial cultures, while leaving intact the unmethylated mutant plasmid generated by PCR. The resulting mixture was transformed into chemically competent *E. coli* TOP10 cells and positive transformants were selected for on LB agar supplemented with 100 µg/mL ampicillin. Plasmid

DNA was purified and mutants were confirmed by DNA sequencing. pMGA-*tcIE* mutant plasmids were transformed into *B. cereus* and selected as described above for pMGA-*tcIE*-KI.

## 5. Extraction of Thiocillin Compounds

WT or *tcIE* mutant *B. cereus* starter cultures (5 mL) were grown in LB for 20 hours at 30 °C. Larger cultures (0.5 L LB in 2 L culture baffles culture flasks) were inoculated with 300 µL of starter culture and grown for 68 hours at 30 °C with shaking at 200 rpm. (*tcIE* mutant strains were grown in media supplemented with 1µg/mL erythromycin and 25µg/mL lincomycin.) Cultures were harvested and both the cell pellet and spent media were saved. To the pellet, 50 mL methanol was added along with 15 g sodium sulfate. The mixture was vortexed vigorously and allowed to sit for at least 10 minutes. The mixture was then filtered through Whatman filter paper (no. 1) and the methanol was removed by vacuum. Solid was solubilized in 10 mL 33% acetonitrile in water for HPLC analysis. *tcIE* mutants that produced compound at low levels were grown in a 5L fermenter in ECPM1 media lacking glycerol (20 g N-Z amine; 3 g Yeast Extract; 1 g KH<sub>2</sub>PO<sub>4</sub>; 4 g K<sub>2</sub>HPO<sub>4</sub>; 1 g NH<sub>4</sub>Cl; 2.4g K<sub>2</sub>SO<sub>4</sub> in 1 L supplemented with 10 mL 100X Trace Elements (5 g EDTA; 0.5 g FeCl<sub>3</sub>•6H<sub>2</sub>O; 0.05 g ZnO; 0.01 g CuCl<sub>2</sub>•2H<sub>2</sub>O; 0.01 g Co(NO<sub>3</sub>)<sub>2</sub>•6H<sub>2</sub>O; 0.01 g (NH<sub>4</sub>)<sub>6</sub> Mo<sub>7</sub>O<sub>24</sub> in 1 L) and 2 mL of 500X Mg/Ca solution (203 g MgCl<sub>2</sub>; 66.2 g CaCl<sub>2</sub> in 1 L). Cells and media were harvested after 24 hours and extraction was performed as detailed above, scaled accordingly.

Further purification was accomplished by ethyl acetate extraction. Solvents were removed from the crude compound extracts on a rotary evaporator. The crude residue was then dissolved in 40 mL of 1:1 EtOAc: water. The biphasic solution was transferred to a 60mL separatory funnel, shaken and the organic layer removed. The aqueous layer was washed with a further 20 mL of EtOAc and the combined organics were dried over Na<sub>2</sub>SO<sub>4</sub>, filtered through a 60 mL coarse fritted glass funnel, and evaporated to dryness. For purposes of assessing the thiocillin content of the individual layers, the residue from the organic layer was redissolved in 10 mL of acetonitrile. 180 µL of the acetonitrile solution was combined with 180 µL of water and 300 µL of this solution was injected onto the analytical HPLC. 300 µL of the aqueous layer was also injected, being careful to avoid the surface organics retained from the extraction.

Additional compound was extracted from the cell free media. The cell free media was passed over a Sep-Pak C18 column (Waters) and material was sequentially eluted with 10 mL of 20%, 50% and 100% acetonitrile in water. Derivatives commonly eluted in 50% acetonitrile. All compounds were finally purified by silica gel chromatography (Biotage, eluate: 95:5% CH<sub>2</sub>Cl<sub>2</sub>:MeOH) for use in disk diffusion and liquid culture assays. Compounds were eluted as mixtures of the tailored states and used as such. Compounds characterized by NMR were further separated by RP-HPLC.

## 6. LC-MS and MS/MS Analysis.

**a. Procedure.** High-resolution LC-MS data was collected in positive ion mode, on an Agilent 6520 Accurate-Mass Q-TOF Mass Spectrometer fitted with an electrospray ionization (ESI) source. The capillary voltage was set to 3500 kV, and the fragmentor voltage at 250 V. The drying gas temperature was maintained at 350°C with a flow rate of 12 L/min and a nebulizer pressure of 45 psi. Separation was effected on a Gemini-NX C18 reverse phase column (5µm, 110A, 2.0 x 50 mm, Phenomenex). Compounds were eluted in a gradient of solvents A (0.1% TFA in water) and B (0.1% TFA in acetonitrile): 2 min. isocratic 2%B, then increasing to 100%B over 10 min., and finally isocratic at 100%B for 2 min. before returning to 2%B and reequilibrating over 4 min. The order of elution relative to tailored states of the final products was conserved across variants, except where the short gradient created elution overlap. In order to better search for the presence of trace quantities of all tailored states, the

cellular extract was loaded “as-is” without further dilution. Under these conditions, the large quantities of major products essentially overloaded the short column in places, causing double peaking and ghost peaks. In order to demonstrate that these second peaks were in fact due to overloading and not regioisomers, the same samples were repeated under dilute conditions and double peaks were observed to coalesce.

## b. Summary

**SI Table 6.1. Summary of tcIE mutants and the thiocillin compounds produced**

|                    |                                                               | RED <sup>a</sup> | PURPLE                    | NAVY       | BLACK                    | GREEN      | LIGHT BLUE               | ORANGE     | PINK                    |
|--------------------|---------------------------------------------------------------|------------------|---------------------------|------------|--------------------------|------------|--------------------------|------------|-------------------------|
| Mutant             | Tailoring (R <sup>1</sup> , R <sup>2</sup> , R <sup>3</sup> ) | H, OH, red       | CH <sub>3</sub> , OH, red | H, OH, ox  | CH <sub>3</sub> , OH, ox | H, H, red  | CH <sub>3</sub> , H, red | H, H, ox   | CH <sub>3</sub> , H, ox |
| 1a <b>T3K</b>      | Expected                                                      | 1186.25224       | 1200.26789                | 1184.23659 | 1198.25224               | 1170.25733 | 1184.27298               | 1168.24168 | 1182.25733              |
|                    | Observed                                                      |                  |                           |            |                          |            | 1184.2744                |            | 1182.256                |
|                    | ppm error                                                     | --               | --                        | --         | --                       | --         | -1.20                    | --         | 1.12                    |
| 1b <b>T3K-succ</b> | Expected                                                      | 1286.26824       | 1300.28389                | 1284.25259 | 1298.26824               | 1270.27333 | 1284.28898               | 1268.25768 | 1282.27333              |
|                    | Observed                                                      |                  |                           |            |                          |            | 1284.2882                |            | 1282.2754               |
|                    | ppm error                                                     | --               | --                        | --         | --                       | --         | 0.61                     | --         | -1.61                   |
| 2 <b>T3D</b>       | Expected                                                      | 1173.18422       | 1187.19987                | 1171.16857 | 1185.18422               | 1157.18931 | 1171.20496               | 1155.17366 | 1169.18931              |
|                    | Observed                                                      |                  | 1187.2011                 |            | 1185.1864                |            | 1171.207                 |            | 1169.1918               |
|                    | ppm error                                                     | --               | -1.04                     | --         | -1.84                    | --         | -1.74                    | --         | -2.13                   |
| 3 <b>T3A</b>       | Expected                                                      | 1129.19439       | 1143.21004                | 1127.17874 | 1141.19439               | 1113.19948 | 1127.21513               | 1111.18383 | 1125.19948              |
|                    | Observed                                                      | 1129.1934        | 1143.2091                 | 1127.1763  | 1141.1948                | 1113.1982  |                          | 1111.1853  |                         |
|                    | ppm error                                                     | 0.88             | 0.82                      | 2.16       | -0.36                    | 1.15       | --                       | -1.32      | --                      |
| 4a <b>T4K</b>      | Expected                                                      | 1204.26281       | 1218.27846                | 1202.24716 | 1216.26281               | 1188.26789 | 1202.28354               | 1186.25224 | 1200.26789              |
|                    | Observed                                                      |                  | 1218.2753                 |            | 1216.2586                |            | 1202.2807                |            | 1200.2674               |
|                    | ppm error                                                     | --               | 2.59                      | --         | 3.46                     | --         | 2.36                     | --         | 0.41                    |
| 4b <b>T4K-succ</b> | Expected                                                      | 1304.27886       | 1318.29451                | 1302.26321 | 1316.27886               | 1288.28394 | 1302.29959               | 1286.26829 | 1300.28394              |
|                    | Observed                                                      |                  |                           |            |                          |            |                          |            |                         |
|                    | ppm error                                                     | --               | --                        | --         | --                       | --         | --                       | --         | --                      |
| 5a <b>T4V</b>      | Expected                                                      | 1175.23626       | 1189.25191                | 1173.22061 | 1187.23626               | 1159.24134 | 1173.25699               | 1157.22569 | 1171.24134              |
|                    | Observed                                                      | 1175.2375        | 1189.2536                 | 1173.2222  | 1187.2383                |            |                          |            |                         |
|                    | ppm error                                                     | -1.06            | -1.42                     | -1.36      | -1.72                    | --         | --                       | --         | --                      |
| 5b <b>T4V-2xOH</b> | Expected                                                      | 1191.23117       | 1205.24682                | 1189.21552 | 1203.23117               | xx         | xx                       | xx         | xx                      |
|                    | Observed                                                      |                  | 1205.2486                 |            | 1203.2331                |            |                          |            |                         |
|                    | ppm error                                                     | --               | -1.48                     | --         | -1.60                    |            |                          |            |                         |
| 6a <b>V6D</b>      | Expected                                                      | 1175.16797       | 1189.18362                | 1173.15232 | 1187.16797               | 1159.16857 | 1173.18422               | 1157.15292 | 1171.16857              |
|                    | Observed                                                      |                  |                           |            |                          |            |                          |            |                         |
|                    | ppm error                                                     | --               | --                        | --         | --                       | --         | --                       | --         | --                      |
| 7a <b>V6K</b>      | Expected                                                      | 1188.23151       | 1202.24716                | 1186.21586 | 1200.23151               | 1172.23659 | 1186.25224               | 1170.22094 | 1184.23659              |
|                    | Observed                                                      |                  |                           |            |                          |            |                          |            |                         |
|                    | ppm error                                                     | --               | --                        | --         | --                       | --         | --                       | --         | --                      |
| 7b <b>V6K-succ</b> | Expected                                                      | 1288.24756       | 1302.26321                | 1286.23191 | 1300.24756               | 1272.25264 | 1286.26829               | 1270.23699 | 1284.25264              |
|                    | Observed                                                      |                  |                           |            |                          |            |                          |            |                         |
|                    | ppm error                                                     | --               | --                        | --         | --                       | --         | --                       | --         | --                      |
| 8 <b>V6A</b>       | Expected                                                      | 1115.17874       | 1129.19439                | 1113.16309 | 1127.17874               | 1131.17366 | 1145.18931               | 1129.15801 | 1143.17366              |
|                    | Observed                                                      | 1115.1791        | 1129.1942                 | 1113.1634  | 1127.1792                | 1131.1738  | 1145.1897                |            |                         |
|                    | ppm error                                                     | -0.32            | 0.17                      | -0.28      | -0.41                    | -0.12      | -0.34                    | --         | --                      |
| 9a <b>T8C</b>      | Expected                                                      | 1161.16647       | 1175.18212                | 1159.15081 | 1173.16647               | 1145.17155 | 1159.1872                | 1143.1559  | 1157.17155              |
|                    | Observed                                                      |                  | 1175.1824                 |            | 1173.1664                |            | 1159.1864                | 1143.1543  |                         |
|                    | ppm error                                                     | --               | -0.24                     | --         | 0.06                     | --         | 0.69                     | 1.40       | --                      |

|     |                     |           |            |            |            |            |            |            |            |            |
|-----|---------------------|-----------|------------|------------|------------|------------|------------|------------|------------|------------|
| 9b  | T8C -<br>thiazole   | Expected  | 1141.14025 | xx         | 1139.1246  | xx         | 1125.14534 | xx         | 1123.12969 | xx         |
|     |                     | Observed  |            |            |            |            |            |            |            |            |
|     |                     | ppm error | --         | --         | --         | --         | --         | --         | --         | --         |
| 9c  | T8C -<br>thiazoline | Expected  | 1143.1559  | xx         | 1141.14025 | xx         | 1127.16099 | xx         | 1125.14534 | xx         |
|     |                     | Observed  |            |            | 1141.1389  |            | 1127.1603  |            | 1125.1445  |            |
|     |                     | ppm error | --         |            | 1.18       |            | 0.61       |            | 0.75       |            |
| 10  | T8A                 | Expected  | 1129.19439 | xx         | 1127.17874 | xx         | 1113.19948 | xx         | 1111.18383 | xx         |
|     |                     | Observed  | 1129.1912  |            | 1127.18    |            | 1113.1996  |            | 1111.1841  |            |
|     |                     | ppm error | 2.83       | --         | -1.12      | --         | -0.11      | --         | -0.24      | --         |
| 11a | T8K                 | Expected  | 1186.25224 | xx         | 1184.23659 | xx         | 1170.25733 | xx         | 1168.24168 | xx         |
|     |                     | Observed  | 1186.2512  |            | 1184.236   |            | 1170.2576  |            | 1168.2417  |            |
|     |                     | ppm error | 0.88       | --         | 0.50       | --         | -0.23      | --         | -0.02      | --         |
| 11b | T8K-succ            | Expected  | 1286.26829 | xx         | 1284.25264 | xx         | 1270.27338 | xx         | 1268.25773 | xx         |
|     |                     | Observed  |            |            |            |            | 1270.274   |            | 1268.2592  |            |
|     |                     | ppm error | --         | --         | --         | --         | -0.49      | --         | -1.16      | --         |
| 12  | T13A                | Expected  | 1147.205   | 1161.2206  | 1145.1893  | 1159.205   | 1131.21    | 1145.2257  | 1129.1944  | 1143.21    |
|     |                     | Observed  | 1147.205   | 1161.2211  |            | 1159.2043  | 1131.2096  | 1145.2265  | 1129.1936  | 1143.2105  |
|     |                     | ppm error | 0.00       | -0.43      | --         | 0.60       | 0.35       | -0.70      | 0.71       | -0.44      |
| 13  | WT <sup>b</sup>     | Expected  | 1159.20496 | 1173.22061 | 1157.18931 | 1171.20496 | 1143.21004 | 1157.22569 | 1141.19439 | 1155.21004 |
|     |                     | Observed  |            | 1173.22    | 1157.1895  | 1171.2047  | 1143.2087  | 1157.2231  | 1141.1922  |            |
|     |                     | ppm error | --         | 0.52       | -0.16      | 0.22       | 1.17       | 2.24       | 1.92       | --         |
| 14  | V6I                 | Expected  | 1173.22061 | 1187.23626 | 1171.20496 | 1185.22061 | 1157.22569 | 1171.24134 | 1155.21004 | 1169.22569 |
|     |                     | Observed  |            | 1187.2392  | 1171.2079  | 1185.2234  | 1157.2287  | 1171.2424  | 1155.2116  |            |
|     |                     | ppm error | --         | -2.48      | -2.51      | -2.35      | -2.60      | -0.91      | -1.35      | --         |
| 15  | V6L                 | Expected  | 1173.2206  | 1187.2363  | 1171.205   | 1185.2206  | 1157.2257  | 1171.2413  | 1155.21    | 1169.2257  |
|     |                     | Observed  |            | 1187.2365  |            | 1185.2227  | 1157.2271  | 1171.239   |            | 1169.2278  |
|     |                     | ppm error | --         | -0.17      | --         | -1.77      | -1.21      | 1.96       | --         | -1.80      |

<sup>a</sup> Colors correspond to peaks on the traces in SI Figures 6.1-6.13. <sup>b</sup> WT thiocillins were extracted from 0.5 L cultures and 6 total compounds were identified. In previous work, WT cultures were grown in 50 x 3 mL samples, resulting in identification of 8 compounds<sup>2</sup>.

### c. MS Traces of Individual Compounds

**d. MS/MS data.** To confirm structural anomalies (e.g., T3K succinylation and T8C cyclodehydration), samples were submitted to targeted CID-MS/MS. For all samples examined, the collision energy was varied between 40 and 65 eV, with optimum fragmentation generally being observed at 45 eV. Representative spectra are illustrated below. Essential diagnostic peaks have been labeled. Two key points of fragmentation proved useful in structural confirmation (**SI Figure 6.14**): 1) cleavage of the C-terminal peptidic residues, and 2) loss of CO from threonine-3 and subsequent fragmentation of the remainder of the residue. These fragmentations were observed in all compounds examined, including the two wild type compounds, Micrococцин P1 and Micrococцин P2. Succinylated T3K was purified by preparative HPLC prior to analysis. All other compounds were submitted as crude mixtures from the methanol extracts.

**SI Figure 6.14. Scheme of MS/MS fragmentation of thiocillin variants**

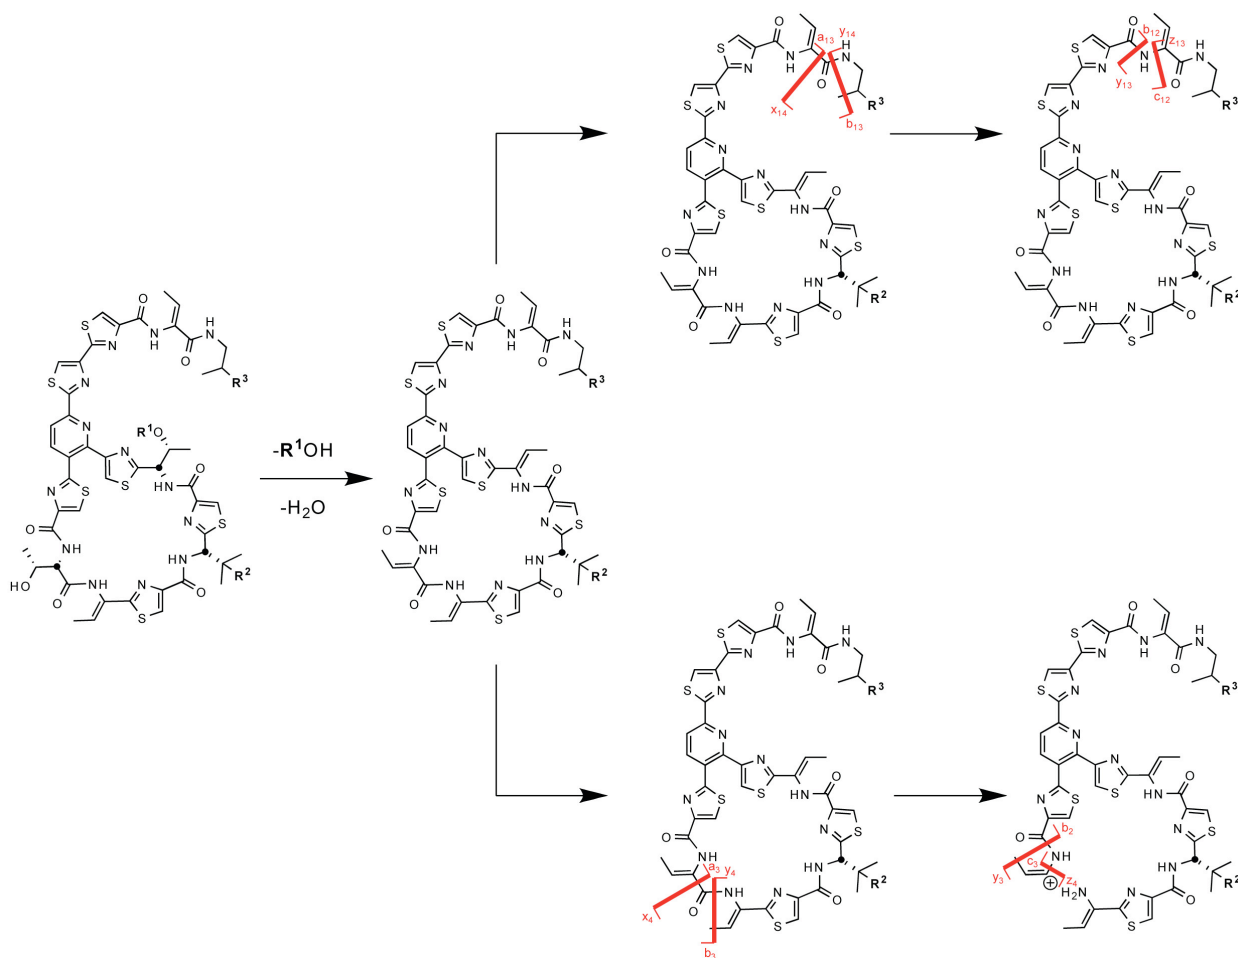



## 8. Disk Diffusion Antibiotic Activity Assays

Thiocillin variants were diluted to 1  $\mu\text{g}/\mu\text{L}$  - 0.125  $\mu\text{g}/\mu\text{L}$  by serial dilution of stock solutions into dimethylsulfoxide. A 5 mL culture of *B. subtilis* strain 168 was grown for 20 hours at 37 °C. The bacterial culture was diluted 1:10,000 in LB-top agar (Luria-Bertani (LB) broth supplemented with 0.7% agar), 4 mL were added to the surface of LB-agar plates and allowed to cool. Paper disks (6 mm diameter, BD Biosciences) were placed on the surface of the plate and 8  $\mu\text{L}$  of thiocillin variant solutions were added to each paper disk. Included on each plate was a negative control containing DMSO only and a positive control containing 0.5  $\mu\text{L}$  of 100 mg/mL ampicillin. Plates were incubated at 37 °C overnight and thiocillin variants that displayed antibiotic activity were identified by zones of inhibition of bacterial growth surrounding the paper disks (SI Figure 8.1).

**SI Figure 8.1. *B. subtilis* growth inhibition by Thiocillin variants determined by disk diffusion assay**

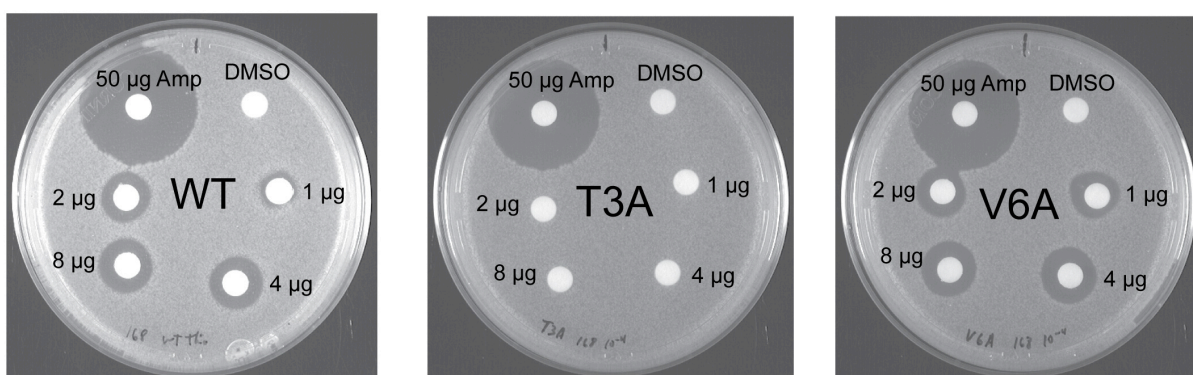

## 9. Determination of Minimum Inhibitory Concentrations (MICs)

Over night cultures of the individual strains (MRSA strains COL and MW2 grown in TSB media and *B. subtilis* strain 168 in LB at 37 °C) were diluted 1000-fold and used to fill 96-well plates (150  $\mu\text{L}$  per well). Serial dilutions of the variant mixtures (1.5  $\mu\text{L}$  of 800-6.25  $\mu\text{g}/\mu\text{L}$  solutions in DMSO) were transferred from library plates to the culture plates. For each variant mixture one adjacent well was treated with 1.5  $\mu\text{L}$  of unadulterated DMSO and one with 1.5  $\mu\text{L}$  of erythromycin (10  $\mu\text{g}/\mu\text{L}$  in 95% ethanol). The plates were incubated at 30 °C for 20 hours. The OD<sub>600</sub> was read on a Perkin Elmer Envision plate reader. MICs were designated as the lowest concentration that produced an increase of less than 10% in OD over that of the adjacent erythromycin well.

**SI Table 9.1. MICs for individual WT Thiocillin compounds against *B. subtilis* and Methicillin-resistant *S. aureus* (MRSA)**

| Strain               | MIC ( $\mu\text{g}/\text{mL}$ ) |                        |                          |                              |
|----------------------|---------------------------------|------------------------|--------------------------|------------------------------|
|                      | Micro P1<br>(H, H, red)         | Micro P2<br>(H, H, ox) | YM-266183<br>(H, OH, ox) | Thiocillin I<br>(H, OH, red) |
| <i>B. subtilis</i>   | 0.2                             | 0.5                    | 0.9                      | 0.9                          |
| <i>S. aureus</i> MW2 | < 0.03                          | 0.06                   | 0.06                     | 0.1                          |
| <i>S. aureus</i> COL | 0.06                            | 0.1                    | 0.1                      | 0.1                          |

Four individual WT thiocillin compounds isolated from *B. cereus* ATCC 14579 were subjected to MIC analysis against *B. subtilis* and two different strains of methicillin-resistant *Staphylococcus aureus* (MRSA). For each strain, all four compounds inhibited growth with similar MICs (**SI Table 3**), validating our method of pooling all compounds produced by each *tcIE* mutant strain for analysis of antibiotic activity by both disk diffusion assays and MIC of liquid culture growth inhibition.

- (1) Sambrook, J.; Fritsch, E. F.; Maniatis, T., *Molecular Cloning. A Laboratory Manual*. 3rd ed. Cold Spring Harbor Laboratory Press: Cold Spring Harbor, NY, **2001**.
- (2) Brown, L. C.; Acker, M. G.; Clardy, J.; Walsh, C. T.; Fischbach, M. A. *Proc. Natl. Acad. Sci. U. S. A.* **2009**, 106, 2549.
- (3) Arnaud, M.; Chastanet, A.; Debarbouille, M. *Appl. Environ. Microbiol.* **2004**, 70, 6887.
- (4) Turgeon, N.; Laflamme, C.; Ho, J.; Duchaine, C. *J. Microbiol. Methods.* **2006**, 67, 543.
